# Supplementary material for: Photoinactivation of Catalase Sensitizes Candida albicans and Candida auris to ROS‐Producing Agents and Immune Cells
Source: PubMed Central journal article supplement (PMC8981478; doi:10.1002/advs.202104384), 2022-02-04
Supplement: ADVS-9-2104384-s001.pdf [file ADVS-9-2104384-s001.pdf]

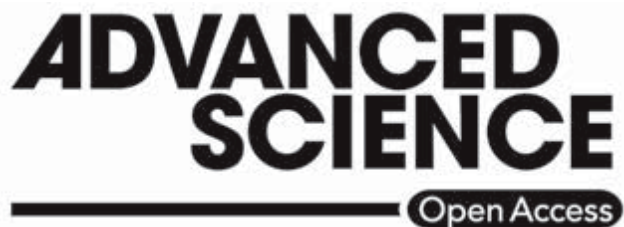

## Supporting Information

for *Adv. Sci.*, DOI: 10.1002/adv.202104384

Photoinactivation of catalase sensitizes *Candida albicans* and *Candida auris* to ROS-producing agents and immune cells

*Pu-Ting Dong, Yuewei Zhan, Sebastian Jusuf, Jie Hui, Zeina Dagher, Michael K. Mansour\**, and *Ji-Xin Cheng\**

Supplementary information for manuscript

**Photoinactivation of catalase sensitizes *Candida albicans* and *Candida auris* to ROS-producing agents and immune cells**

Pu-Ting Dong<sup>1,2,#</sup>, Yuewei Zhan<sup>1,2,#</sup>, Sebastian Jusuf<sup>1,2,#</sup>, Jie Hui<sup>1,2,#</sup>, Zeina Dagher<sup>3,4</sup>, Michael K. Mansour<sup>3,4,\*</sup>, Ji-Xin Cheng<sup>1,2,\*</sup>

<sup>1</sup>Department of Biomedical Engineering, Boston University, Boston, MA02215, USA.

<sup>2</sup>Photonics Center, Boston University, Boston, MA02215, USA.

<sup>3</sup>Division of Infectious Diseases, Massachusetts General Hospital, Boston, MA02114, USA.

<sup>4</sup>Harvard Medical School, Boston, MA02115, USA.

\*Corresponding authors. Emails: [jxcheng@bu.edu](mailto:jxcheng@bu.edu) and [mkmansour@partners.org](mailto:mkmansour@partners.org)

#These authors contributed equally: Pu-Ting Dong, Yuewei Zhan, Sebastian Jusuf, Jie Hui.

**This file includes:**

Supplementary Figures 1-13

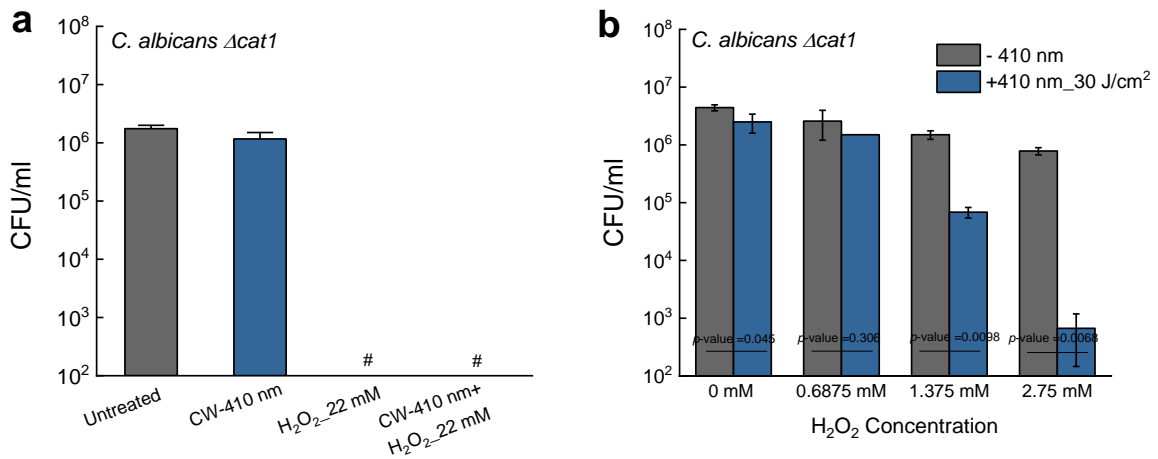

**Supplementary Figure 1. CFU/ml of catalase-deficient *C. albicans*  $\Delta cat1$  under different treatment schemes. Data: Mean+SD. N=3. Student unpaired *t*-test. \*:  $p < 0.05$ , \*\*:  $p < 0.01$ ; \*\*\*:  $p < 0.001$ .**

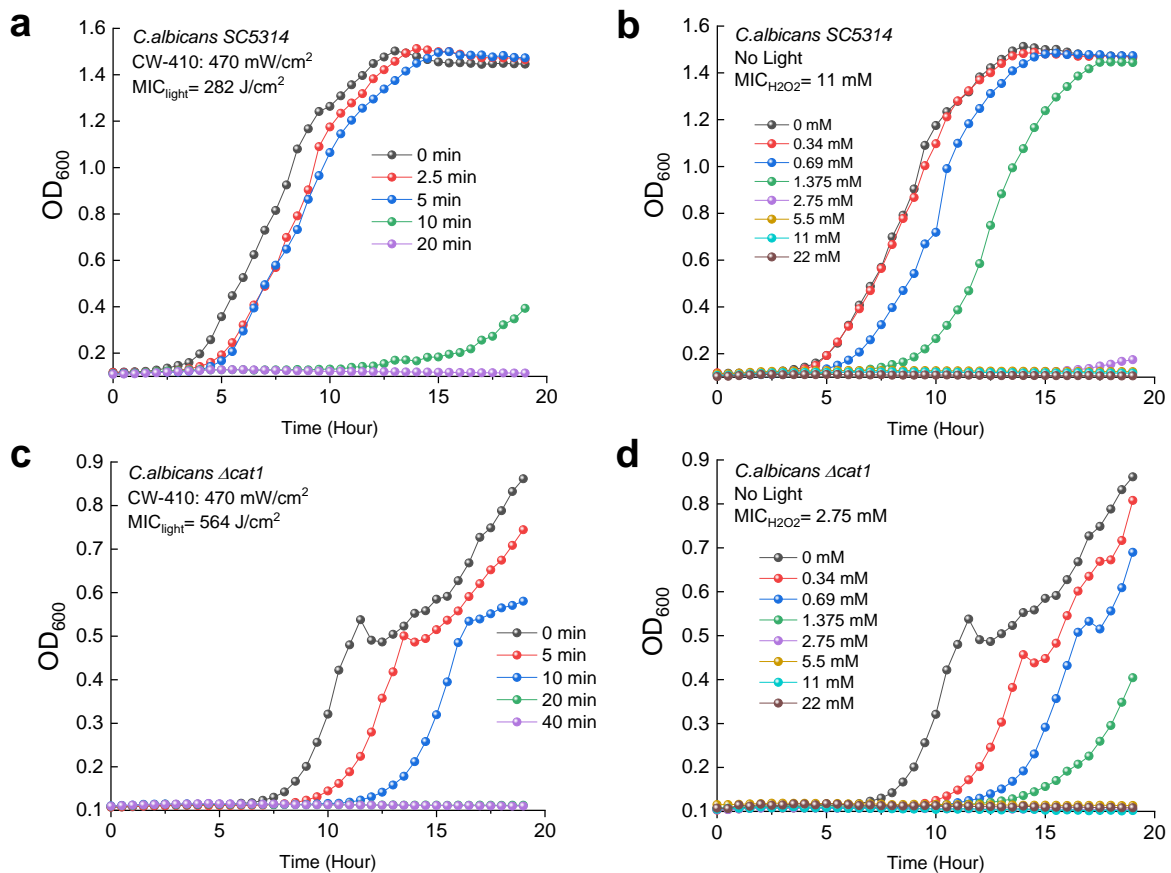

**Supplementary Figure 2. Minimal inhibitory concentrations of 410 nm exposure and  $H_2O_2$  against *C. albicans* SC5314 and catalase-deficient *C. albicans*  $\Delta cat1$ .**

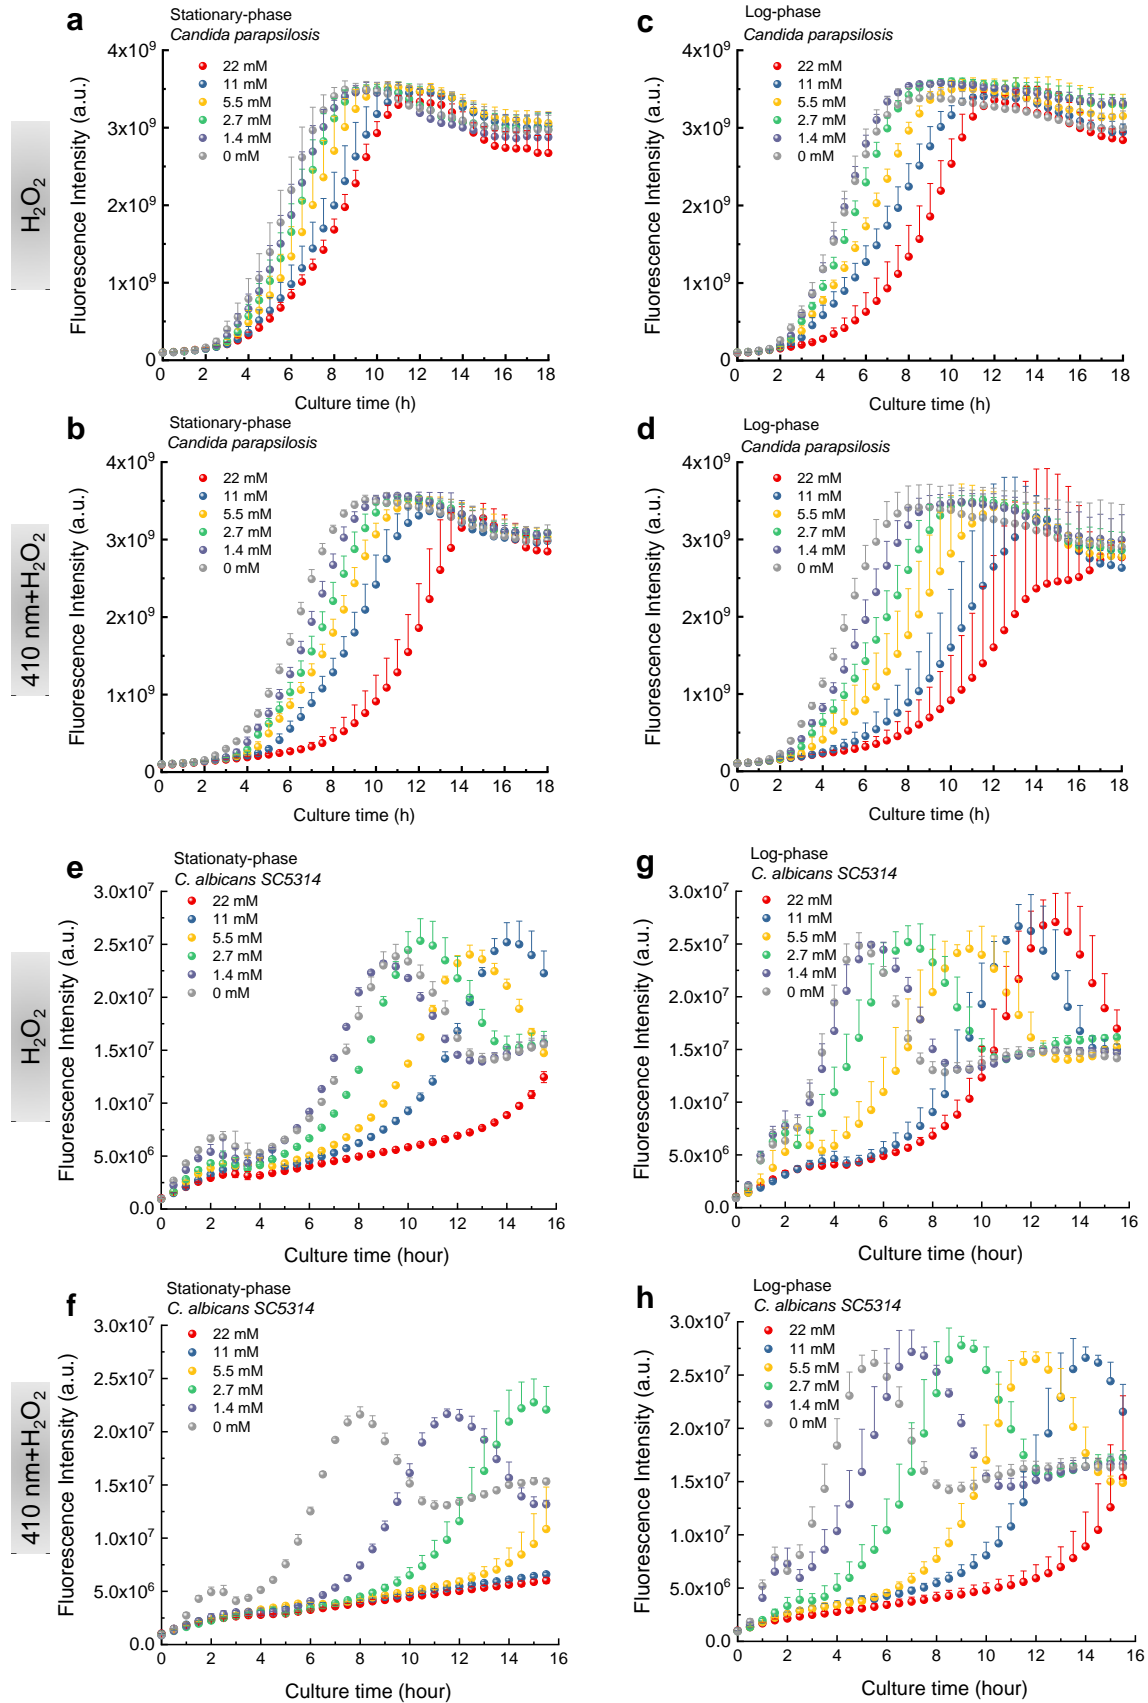

**Supplementary Figure 3. Time-course PrestoBlue fluorescence intensity from various fungal species under the treatment of 410 nm and H<sub>2</sub>O<sub>2</sub> of various concentrations.**

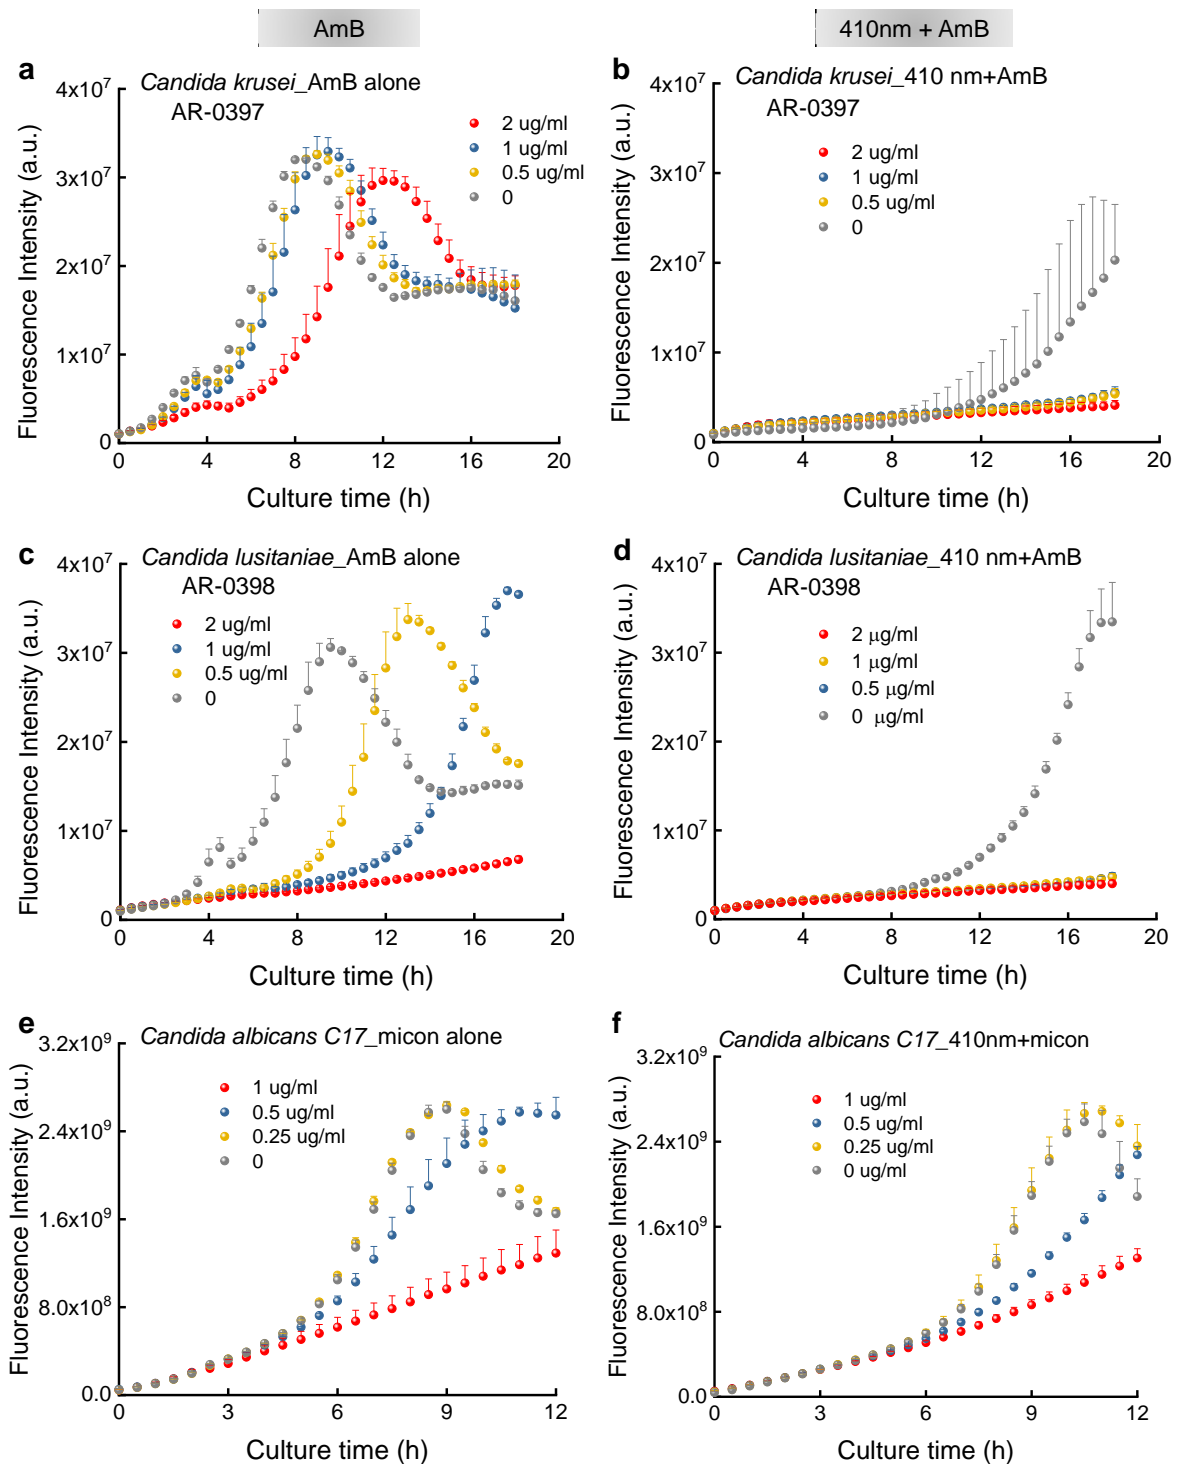

**Supplementary Figure 4. Time-course PrestoBlue fluorescence intensity from various fungal species under the treatment of 410 nm and antifungal drugs. Abbreviations: AmB (amphotericin B), micon (miconazole).**

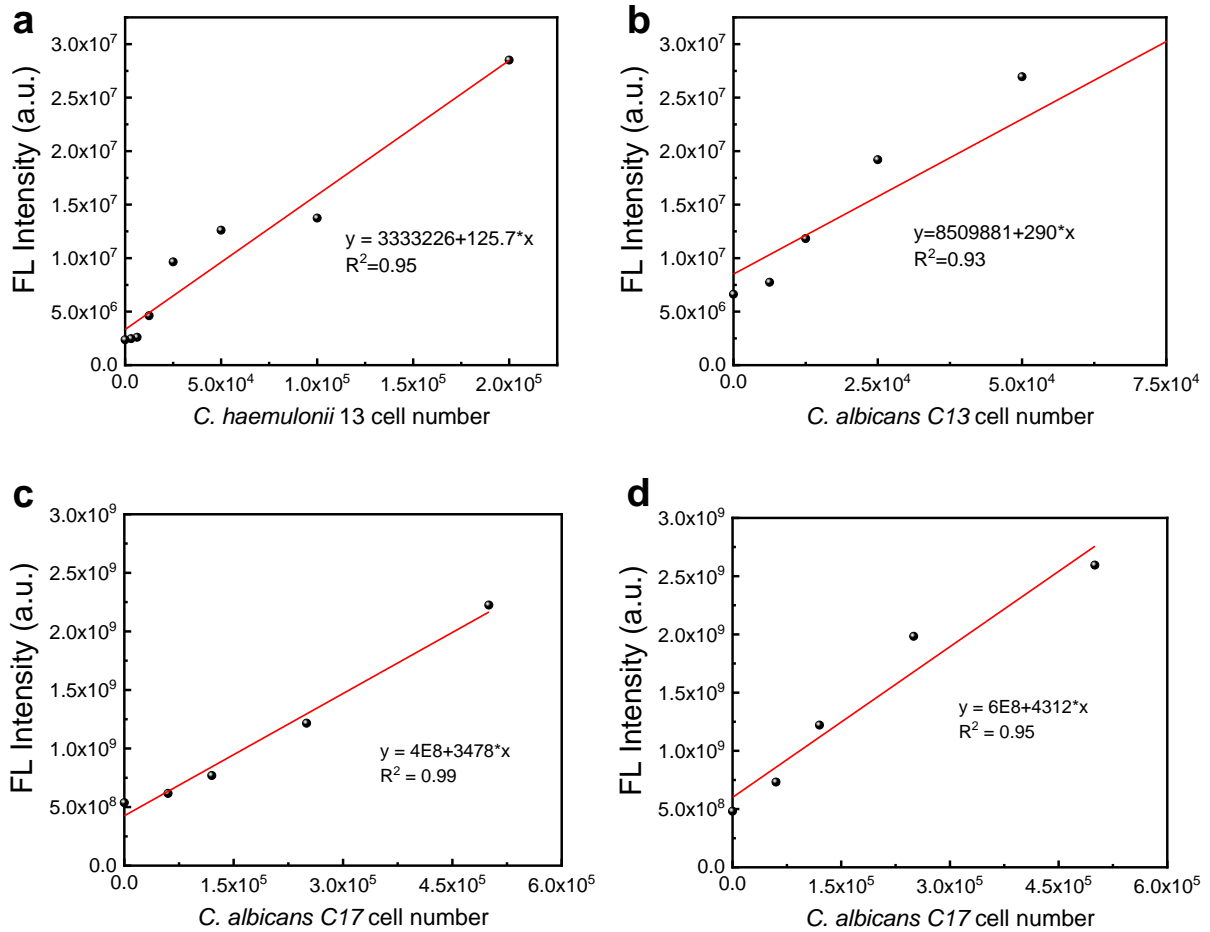

**Supplementary Figure 5. Calibration curves of *Candida* spp. CFU/ml versus PrestoBlue fluorescence intensity.**

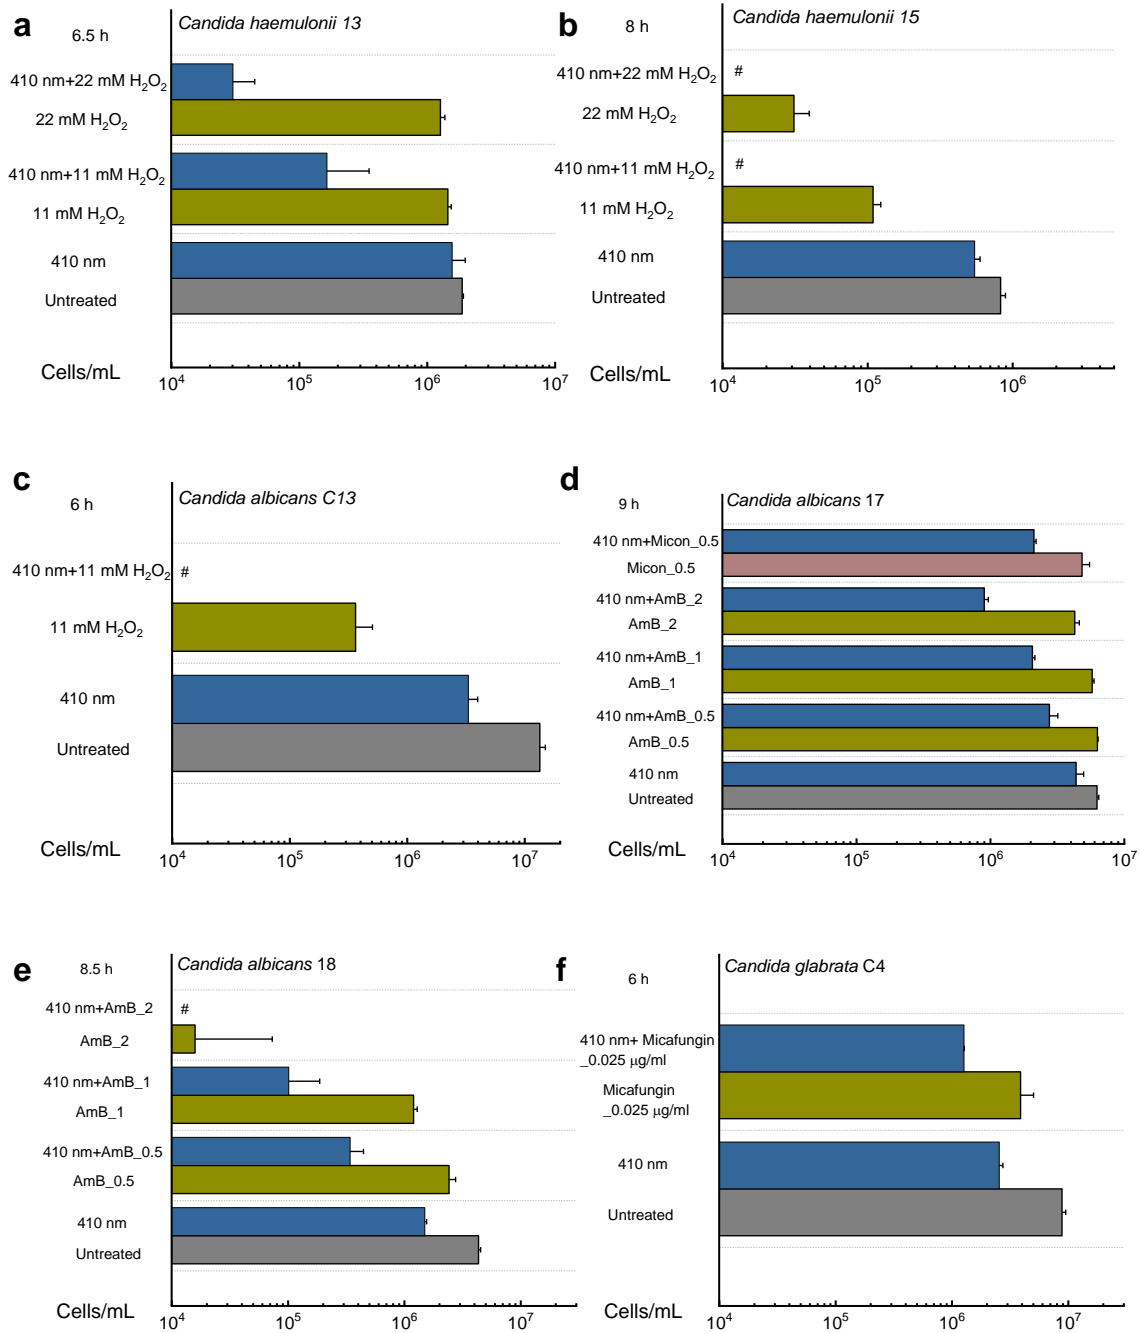

**Supplementary Figure 6. Derived *Candida* cells/mL after different treatments based on the calibration curves. Data: Mean+SD. N=3. Pound sign (#) means below the detection limit.**

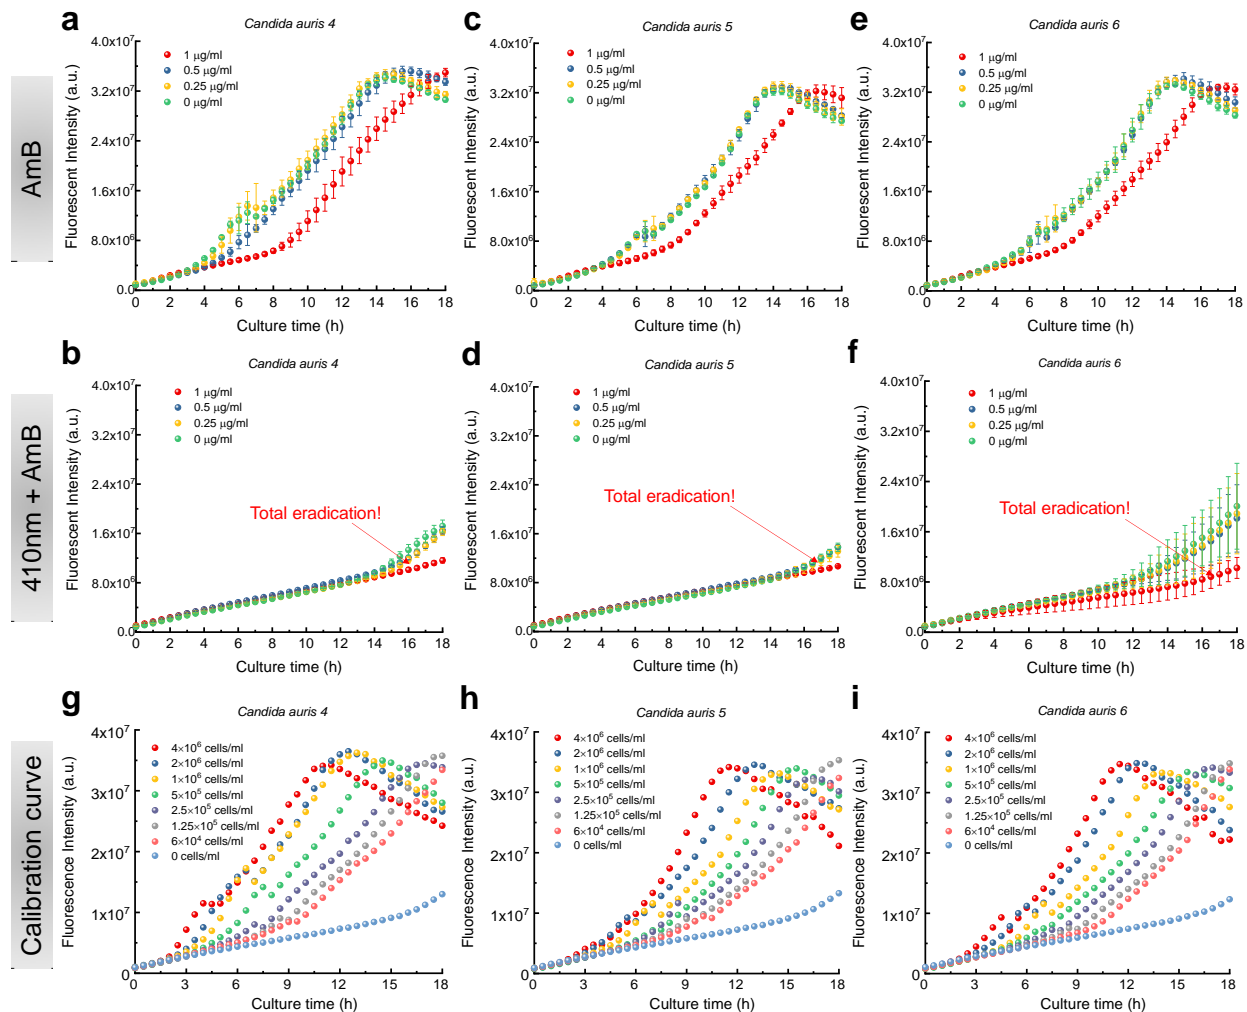

**Supplementary Figure 7. Time-course PrestoBlue fluorescence intensity from various *Candida auris* strains under the treatment of 410 nm and antifungal drugs. Abbreviation: AmB (amphotericin B).**



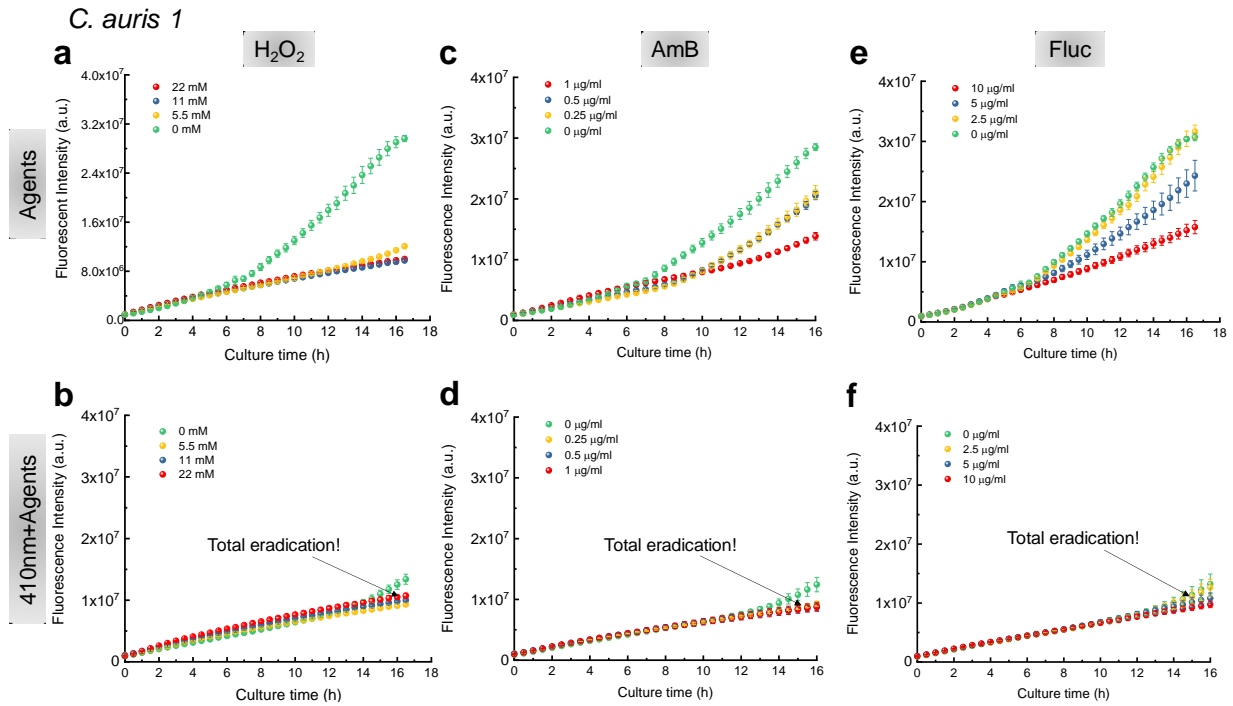

**Supplementary Figure 8. Time-course PrestoBlue fluorescence intensity from *Candida auris* 1 under the treatment of 410 nm and antifungal agents. Abbreviations: AmB (amphotericin B), Fluc (fluconazole).**

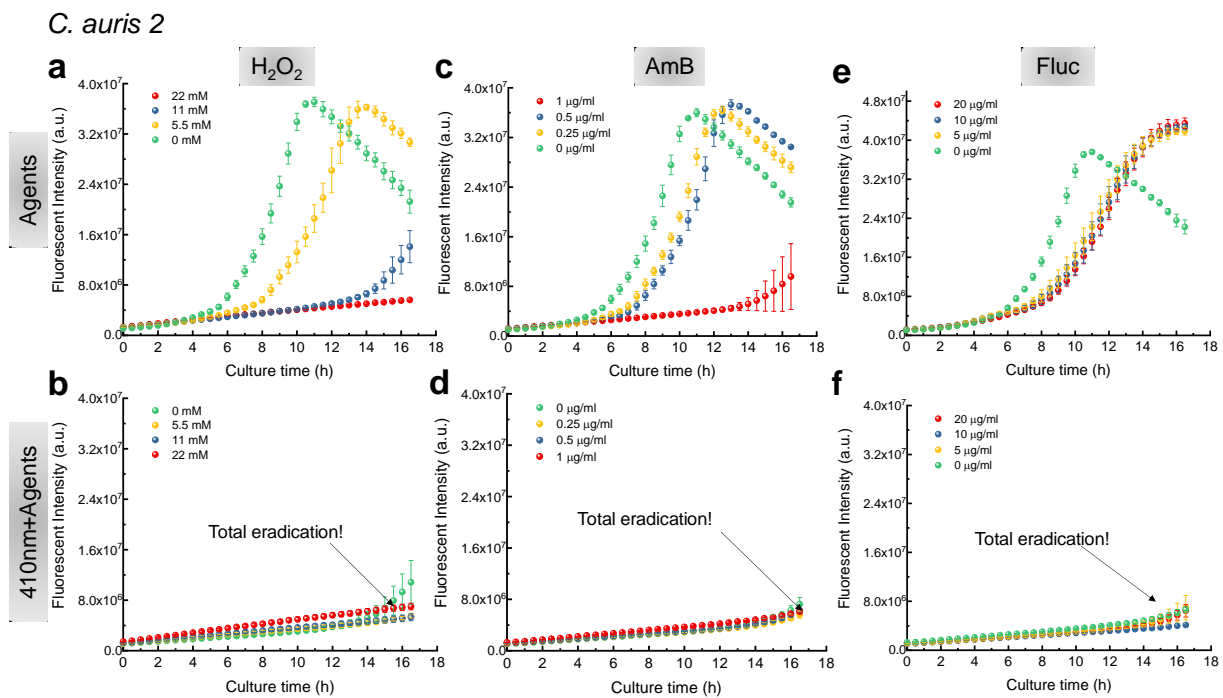

**Supplementary Figure 9. Time-course PrestoBlue fluorescence intensity from *Candida auris* 2 under the treatment of 410 nm and antifungal agents.** Abbreviations: AmB (amphotericin B), Fluc (fluconazole).

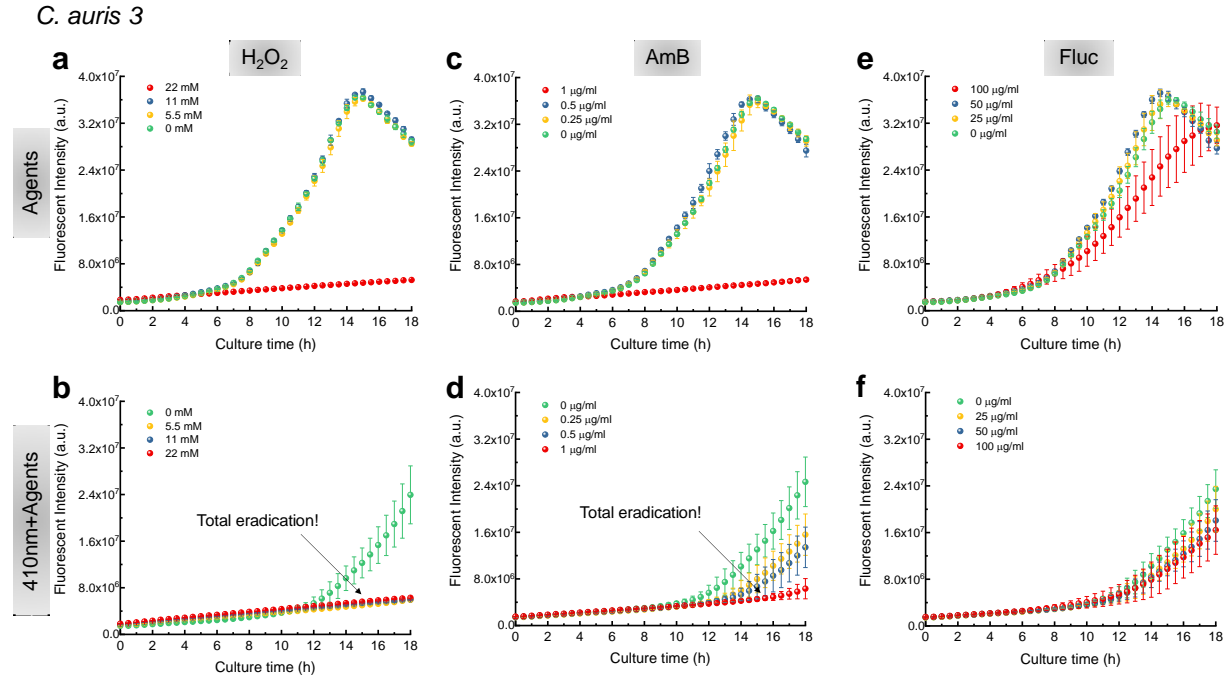

**Supplementary Figure 10. Time-course PrestoBlue fluorescence intensity from *Candida auris* 3 under the treatment of 410 nm and antifungal agents.** Abbreviations: AmB (amphotericin B), Fluc (fluconazole).

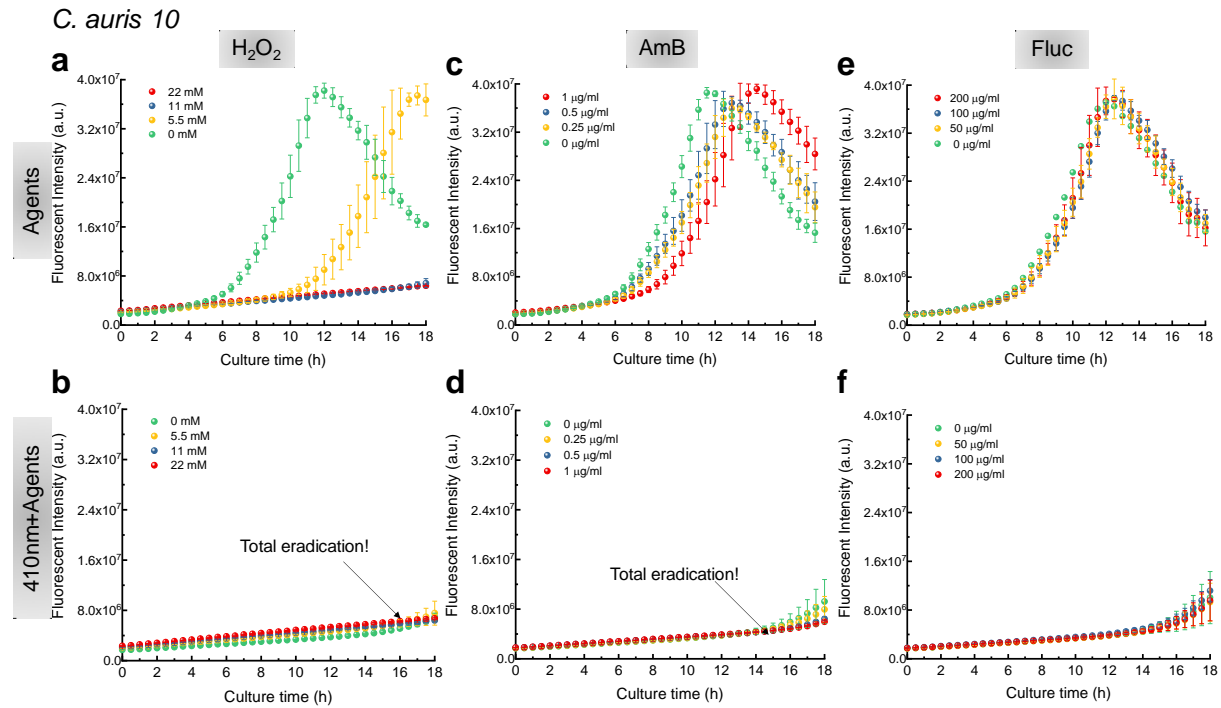

**Supplementary Figure 11. Time-course PrestoBlue fluorescence intensity from *Candida auris* 10 under the treatment of 410 nm and antifungal agents.** Abbreviations: AmB (amphotericin B), Fluc (fluconazole).

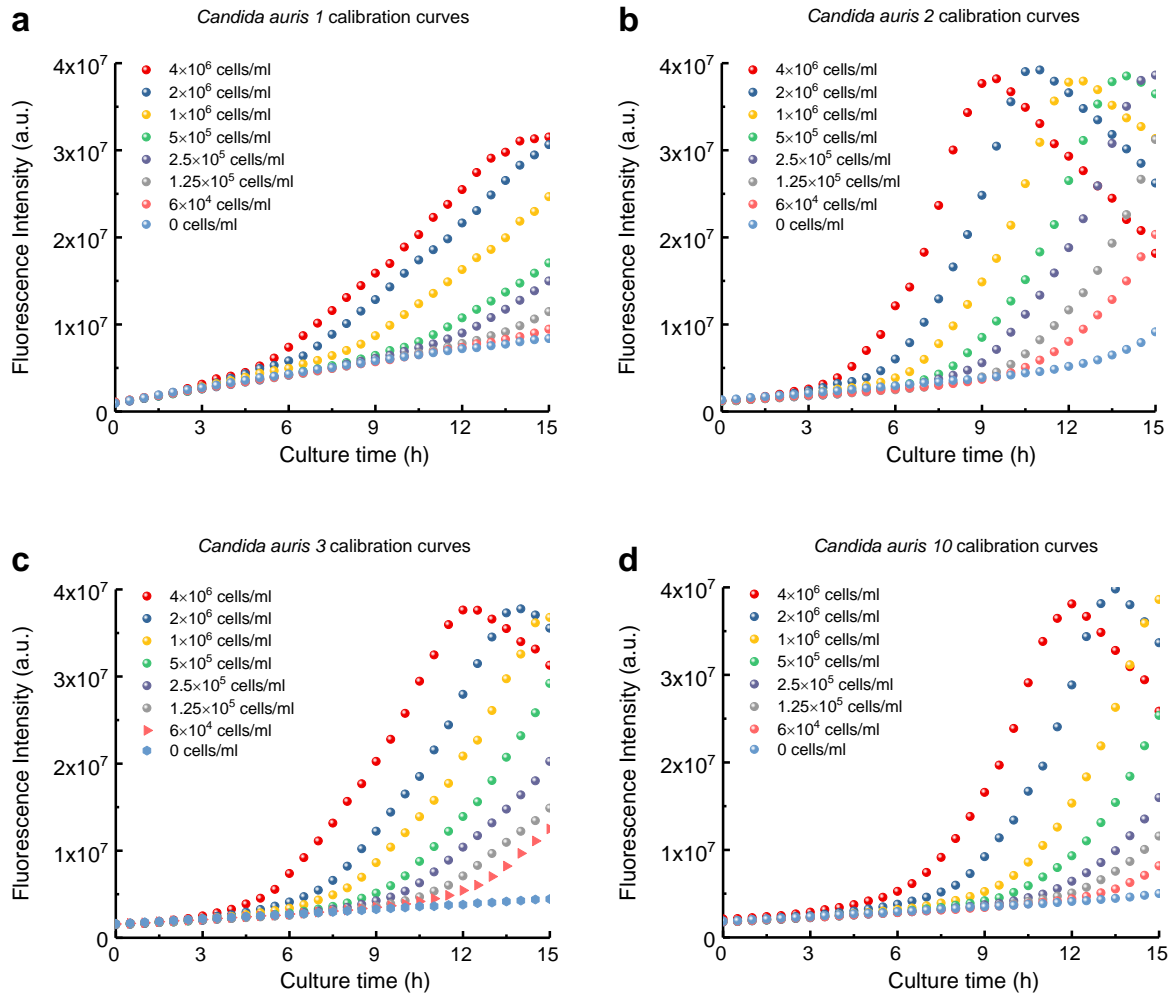

**Supplementary Figure 12. Time-course PrestoBlue fluorescence intensity of *Candida auris* strains at specific concentrations.**

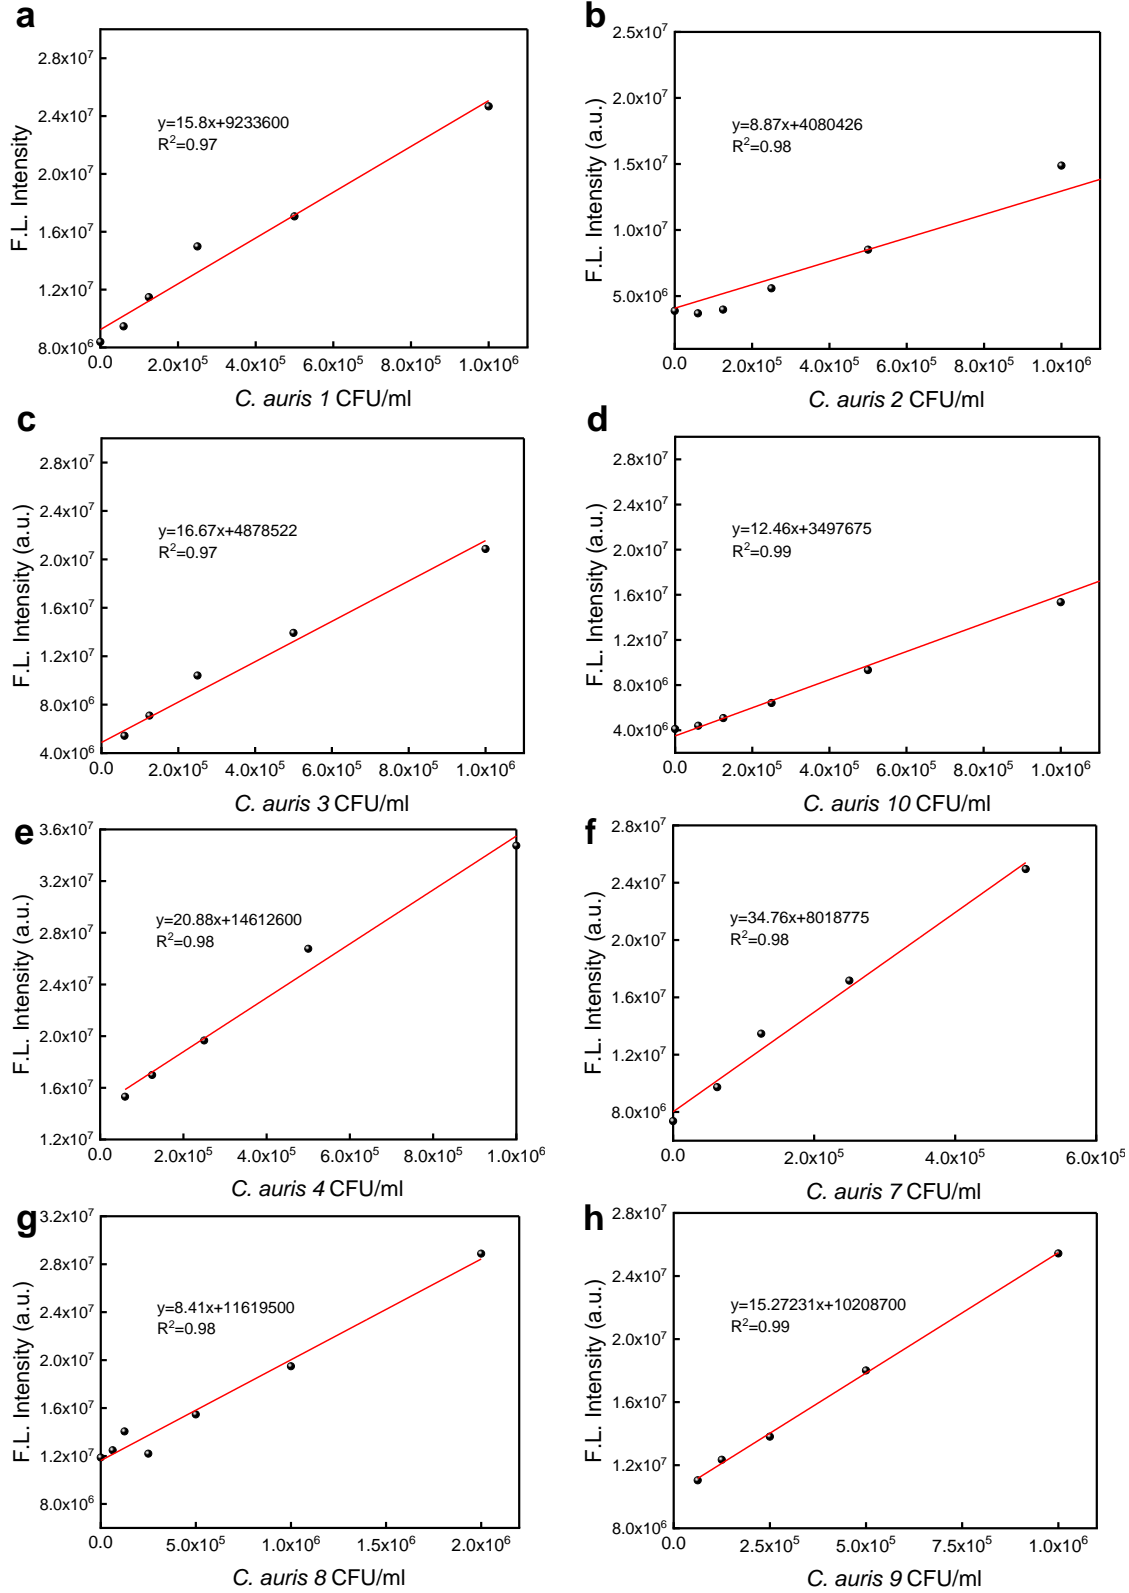

**Supplementary Figure 13. Calibration curves of *C. auris* CFU/ml versus prestoblu fluorescence intensity.**
